# Supplementary material for: Outcomes and Feasibility of a 12-Week Physical Literacy Intervention for Children in an Afterschool Program
Source: PubMed Central journal article supplement (PMC7246927; doi:10.3390/ijerph17093129), 2020-04-30
Supplement: ijerph-17-03129-s001.pdf [file ijerph-17-03129-s001.pdf]

Supplementary Material

Table S1. Questions included in the program leader questionnaire.

| Outcome              | Question Stem                               | Question                                                                                                                                                                    |                                                           |
|----------------------|---------------------------------------------|-----------------------------------------------------------------------------------------------------------------------------------------------------------------------------|-----------------------------------------------------------|
| Perceived Knowledge  | To what extent are you knowledgeable about: | The best things to say in order to effectively communicate your confidence in your students' abilities?                                                                     |                                                           |
|                      |                                             | Best things to do in order to effectively communicate your confidence in your students' abilities?                                                                          |                                                           |
|                      |                                             | The best times/situations to effectively communicate your confidence in your students' abilities during physical activity sessions?                                         |                                                           |
|                      |                                             | The best ways to effectively tailor your feedback to different students?                                                                                                    |                                                           |
|                      |                                             | The best ways to instruct peers to help kids develop confidence in each other's physical activity and sport abilities?                                                      |                                                           |
|                      |                                             | The best ways to create gender inclusive physical activity and sport learning environments?                                                                                 |                                                           |
|                      |                                             | The best ways to create gender inclusive physical activity and sport playing environments?                                                                                  |                                                           |
|                      |                                             | The best ways to create physical activity and sport learning environments where higher skilled children instruct lower skilled children?                                    |                                                           |
|                      |                                             | The best ways to create mixed physical activity and sport playing environments consisting of higher skilled and lower skilled children?                                     |                                                           |
|                      |                                             | The [program] physical activity lesson plans?                                                                                                                               |                                                           |
| Outcome Expectations | At this point in time:                      | To what extent do you think providing verbal feedback helps kids develop confidence in their physical activity and sport abilities?                                         |                                                           |
|                      |                                             | To what extent do you think providing non-verbal feedback helps kids develop confidence in their physical activity and sport abilities?                                     |                                                           |
|                      |                                             | To what extent do you think that peers can help kids develop confidence in each other's physical activity and sport abilities?                                              |                                                           |
|                      |                                             | To what extent do you think that males are better than females at physical activity and sport tasks?                                                                        |                                                           |
|                      |                                             | To what extent do you think it is important to create gender inclusive physical activity and sport learning environments?                                                   |                                                           |
|                      |                                             | To what extent do you think it is important to create gender inclusive physical activity and sport playing environments?                                                    |                                                           |
|                      |                                             | To what extent do you think that it is important to create physical activity and sport learning environments where higher skilled children instruct lower skilled children? |                                                           |
|                      |                                             | To what extent do you think that it is important to create mixed physical activity and sport playing environments consisting of higher skilled and lower skilled children?  |                                                           |
|                      |                                             | Effectively communicating confidence in my students' abilities would:                                                                                                       | Make them feel more confident in their own abilities.     |
|                      |                                             |                                                                                                                                                                             | Motivate them to attempt things they haven't done before. |

|                                                                |                                           |                                                                                                                                                                                                                                                                                                                                                                                                                                                                                                                                                                                                                                                                                                                                                                                                                                                                                                                                                                                                                                                                                                                 |
|----------------------------------------------------------------|-------------------------------------------|-----------------------------------------------------------------------------------------------------------------------------------------------------------------------------------------------------------------------------------------------------------------------------------------------------------------------------------------------------------------------------------------------------------------------------------------------------------------------------------------------------------------------------------------------------------------------------------------------------------------------------------------------------------------------------------------------------------------------------------------------------------------------------------------------------------------------------------------------------------------------------------------------------------------------------------------------------------------------------------------------------------------------------------------------------------------------------------------------------------------|
|                                                                |                                           | <p>Make them try harder when they attempt difficult tasks.</p> <p>Help them keep trying harder when they are practicing difficult skills.</p> <p>Make them feel less anxious about performing difficult tasks.</p> <p>Enhance the impact of my instructions (as a leader).</p> <p>Improve my relationship with them (as a leader).</p>                                                                                                                                                                                                                                                                                                                                                                                                                                                                                                                                                                                                                                                                                                                                                                          |
| Self-efficacy                                                  | How confident are you in your ability to? | <p>Use verbal feedback to effectively communicate your belief in your students' abilities?</p> <p>Use non-verbal feedback to effectively communicate your belief in your students' abilities?</p> <p>Effectively communicate your belief in your students' abilities during every physical activity session?</p> <p>Communicate your belief in your students' abilities in a way that seems genuine?</p> <p>Identify appropriate situations for which to communicate your belief in your students' abilities?</p> <p>Instruct peers to help kids develop confidence in each other's physical activity and sport abilities?</p> <p>Create gender inclusive physical activity and sport learning environments?</p> <p>Create gender inclusive physical activity and sport playing environments?</p> <p>Create physical activity and sport learning environments where higher skilled children instruct lower skilled children?</p> <p>Create mixed learning and playing environments consisting of higher skilled and lower skilled children?</p> <p>Administer the [program] physical activity lesson plans?</p> |
| Intentions (only measured post-training and post-intervention) | At this point in time:                    | <p>I intend to use verbal feedback to effectively communicate my confidence in my students' physical activity and sport abilities.</p> <p>I intend to use non-verbal feedback to effectively communicate my confidence in my students' physical activity and sport abilities.</p> <p>I intend on communicating my confidence in my students' physical and sport abilities during every physical activity session.</p> <p>I intend to use peers to help kids develop confidence in each other's physical activity and sport abilities.</p> <p>I intend to use gender inclusive physical activity and sport learning environments.</p> <p>I intend to use gender inclusive physical activity and sport playing environments.</p> <p>I intend to use higher skilled children to instruct lower skilled children.</p> <p>I intend to use mixed playing environments consisting of higher and lower skilled children.</p> <p>I intend to use the [program] physical activity lesson plans each week.</p>                                                                                                             |
